# Supplementary material for: Assessment of the Preventive Effect of L-carnitine on Post-statin Muscle Damage in a Zebrafish Model
Source: MDPI journal article supplement (doi:10.3390/cells11081297), 2022-04-11
Supplement: s1 [file s1]

Supplementary Materials

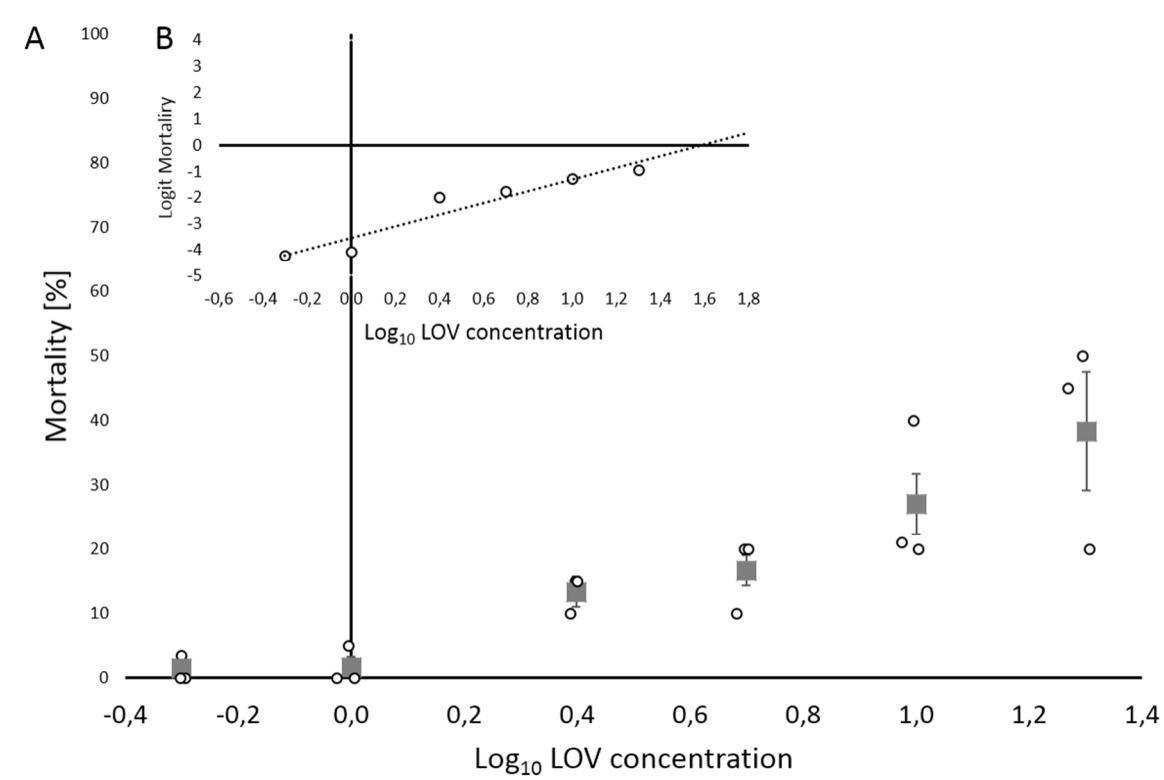

Figure S1. Zebrafish mortality and LC50 calculation.

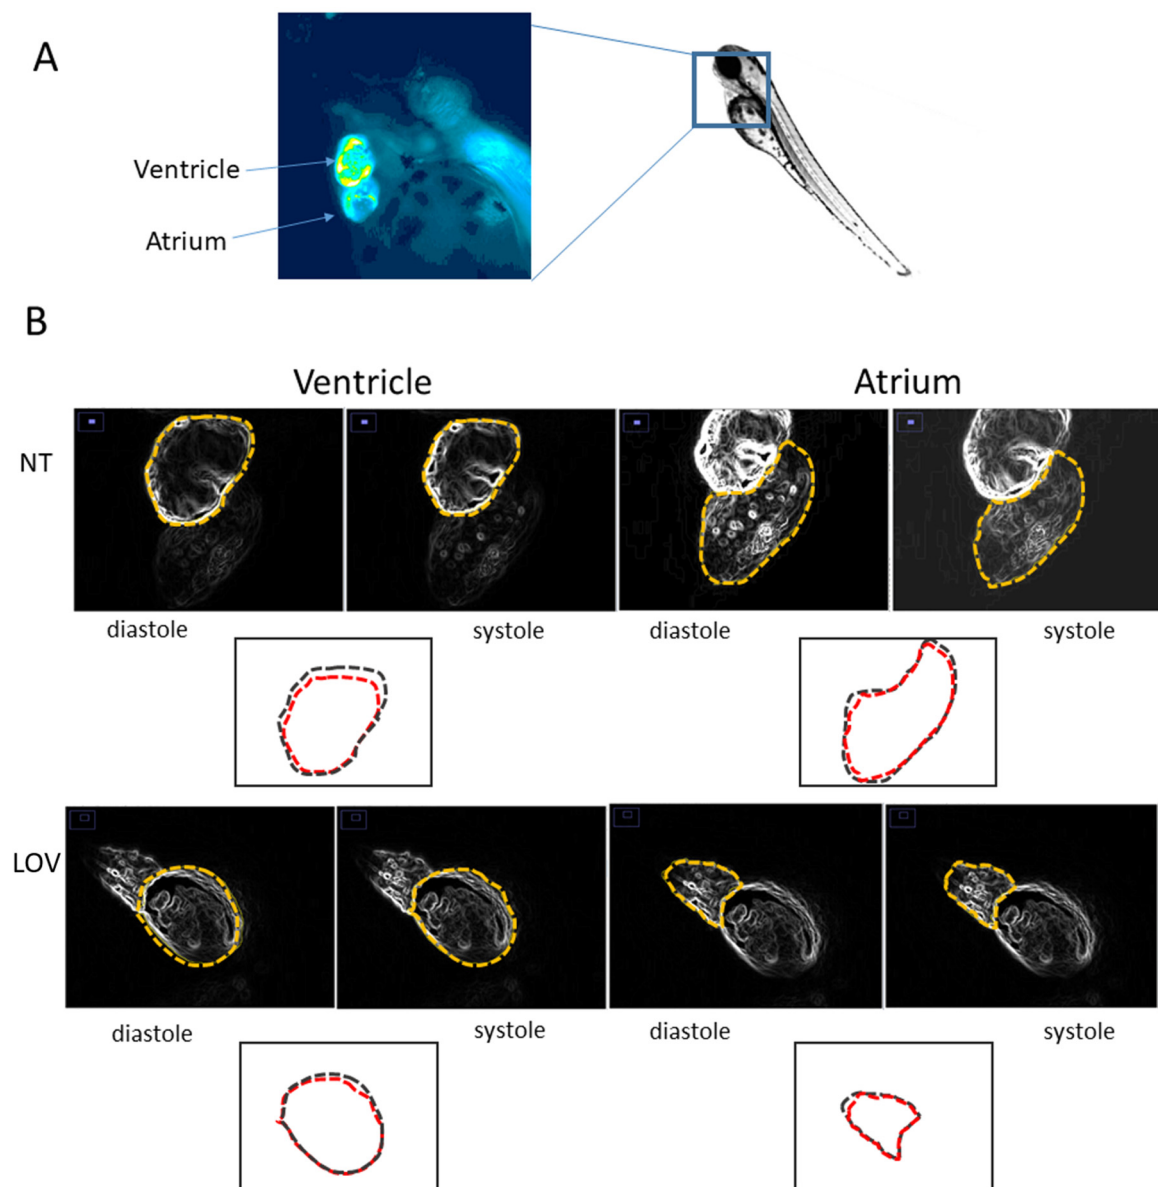

Figure S2. Analysis of zebrafish larva heart contraction on the basis of time-lapse images.

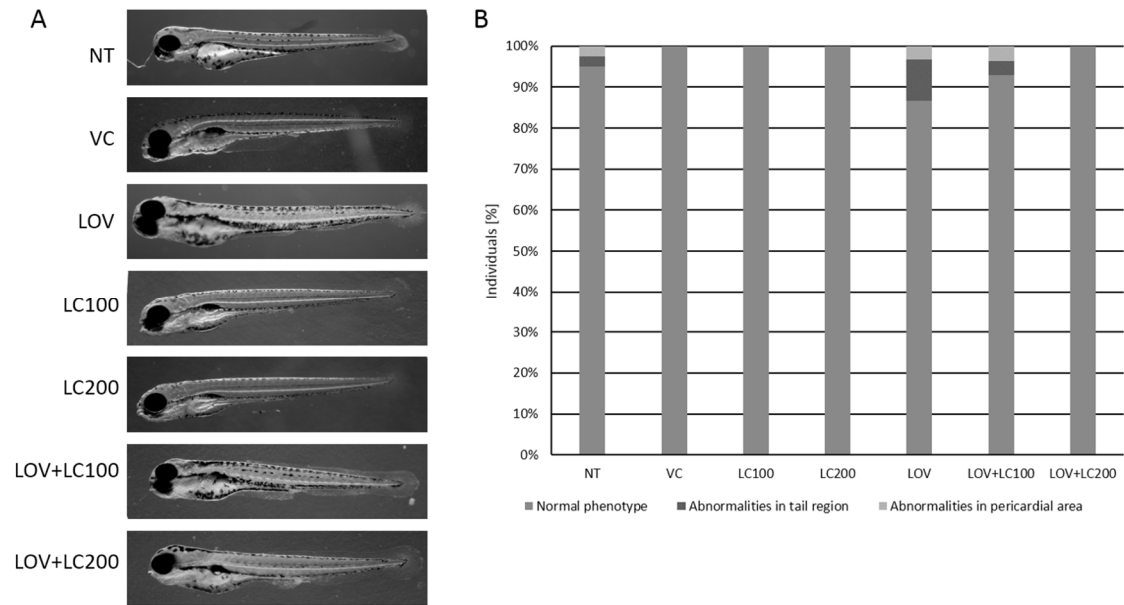

Figure S3. Analysis of morphology of 120 hpf zebrafish larvae exposed to lovastatin (LOV) and L-carnitine (LC) treatment.
